# Supplementary material for: Bacterial Foraging Optimization –Genetic Algorithm for Multiple Sequence Alignment with Multi-Objectives
Source: PubMed Central journal article supplement (PMC5562892; doi:10.1038/s41598-017-09499-1), 2017-08-18
Supplement: 41598_2017_9499_MOESM1_ESM.pdf [file 41598_2017_9499_MOESM1_ESM.pdf]

# Bacterial Foraging Optimization –Genetic Algorithm for Multiple Sequence Alignment with Multi-Objectives

P.Manikandan<sup>1</sup>, Dr. D. Ramyachitra<sup>2</sup>,

<sup>1</sup>Research Scholar, <sup>2</sup>Assistant Professor,

Department of Computer Science, Bharathiar University, Coimbatore-641 046, India.

[manimkn89@gmail.com](mailto:manimkn89@gmail.com)<sup>1</sup>, [jaichitra1@yahoo.co.in](mailto:jaichitra1@yahoo.co.in).

## Performance Measures of Optimization Algorithms and Phylogenetic Tree Construction

The Supplementary Table 1-2 shows the comparison of performance measures such as the Sum-of-Pairs (SP) and Total Column Score (TCS) for the proposed and existing algorithms (GA, ACO, ABC, PSO) and also with various online MSA tools such as T-Coffee, Muscle, K-Align, MAFFT and Clustal Omega. From these results, it is inferred that the proposed BFO-GA algorithm provides better results than the existing methods and tools. Also the Supplementary Fig. 1 shows the small tree containing a part of Operational Taxonomic Unit (OTUs) for the proposed and existing algorithms with respect to RV3 reference family in BaliBASE database.

**Table.1 : Comparisons of Sum of Pairs (SP) scores for the existing and the proposed algorithm for the MSA datasets**

| Database | T-Coffee | Clustal Omega | Kalign | MUSCLE | MAFFT | GA | ACO | ABC | PSO | <b>BFO-GA</b> |
|----------|----------|---------------|--------|--------|-------|----|-----|-----|-----|---------------|
| Balibase | 54       | 55            | 55     | 59     | 61    | 63 | 70  | 80  | 83  | <b>90</b>     |
| Sabmark  | 57       | 58            | 59     | 61     | 62    | 64 | 74  | 82  | 82  | <b>90</b>     |
| Prefab   | 57       | 52            | 51     | 55     | 59    | 60 | 65  | 80  | 76  | <b>88</b>     |
| Oxbench  | 50       | 49            | 51     | 55     | 58    | 61 | 74  | 83  | 86  | <b>90</b>     |

**Table.2 : Comparisons of Total Column Score (TCS) scores for the existing and the proposed algorithm for the MSA datasets**

| Database | T-Coffee | Clustal Omega | Kalign | MUSCLE | MAFFT | GA | ACO | ABC | PSO | <b>BFO-GA</b> |
|----------|----------|---------------|--------|--------|-------|----|-----|-----|-----|---------------|
| Balibase | 42       | 43            | 45     | 49     | 53    | 58 | 58  | 56  | 67  | <b>77</b>     |
| Sabmark  | 43       | 48            | 52     | 53     | 55    | 57 | 56  | 61  | 55  | <b>79</b>     |
| Prefab   | 51       | 49            | 50     | 53     | 54    | 56 | 59  | 64  | 59  | <b>75</b>     |
| Oxbench  | 48       | 46            | 50     | 52     | 54    | 56 | 59  | 67  | 56  | <b>75</b>     |

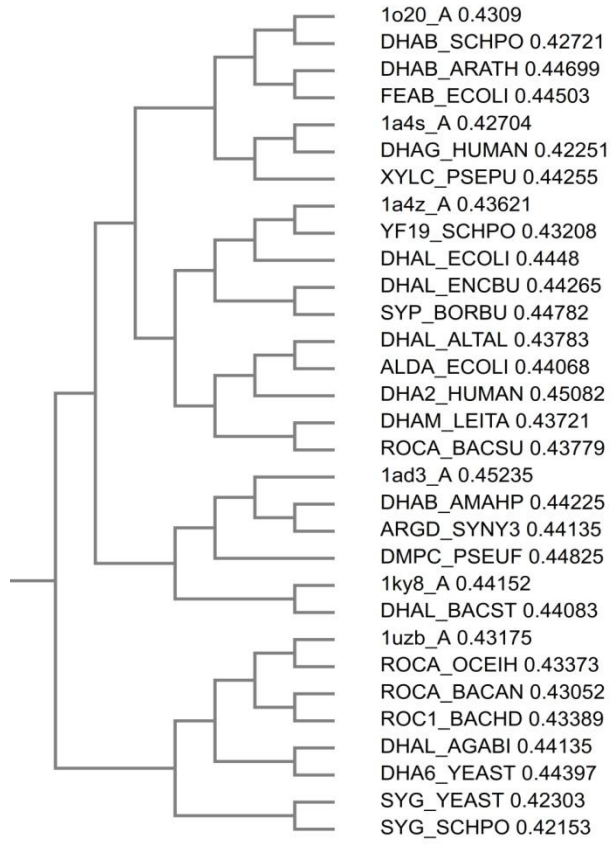

**GA**

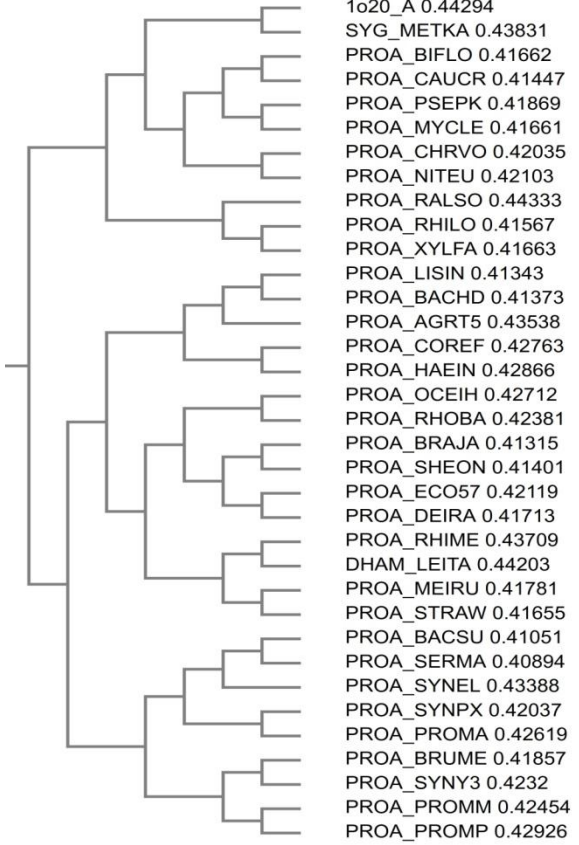

**ACO**

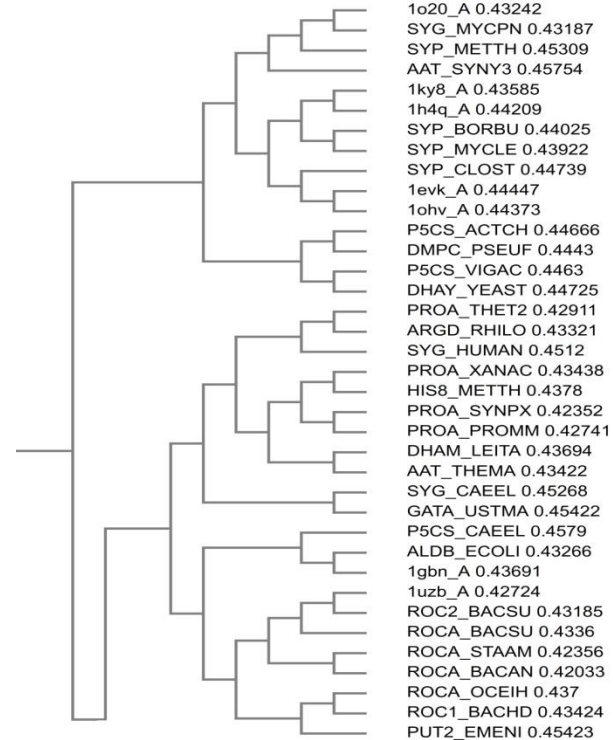

**ABC**

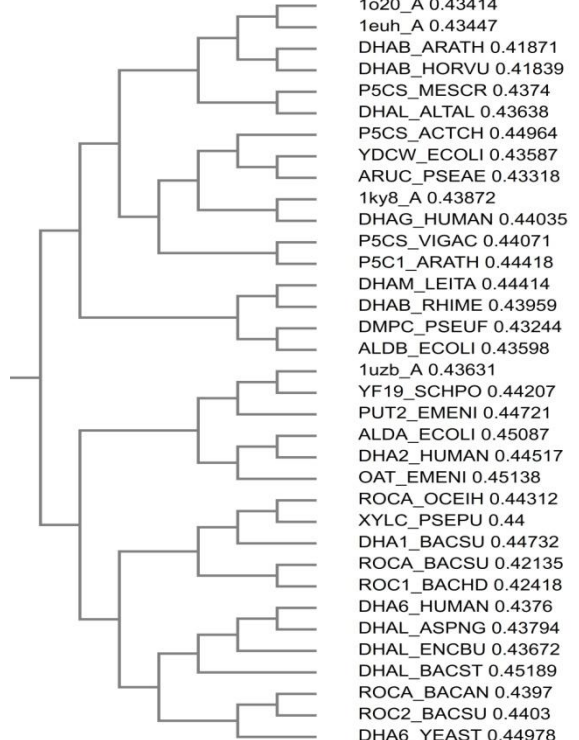

**PSO**

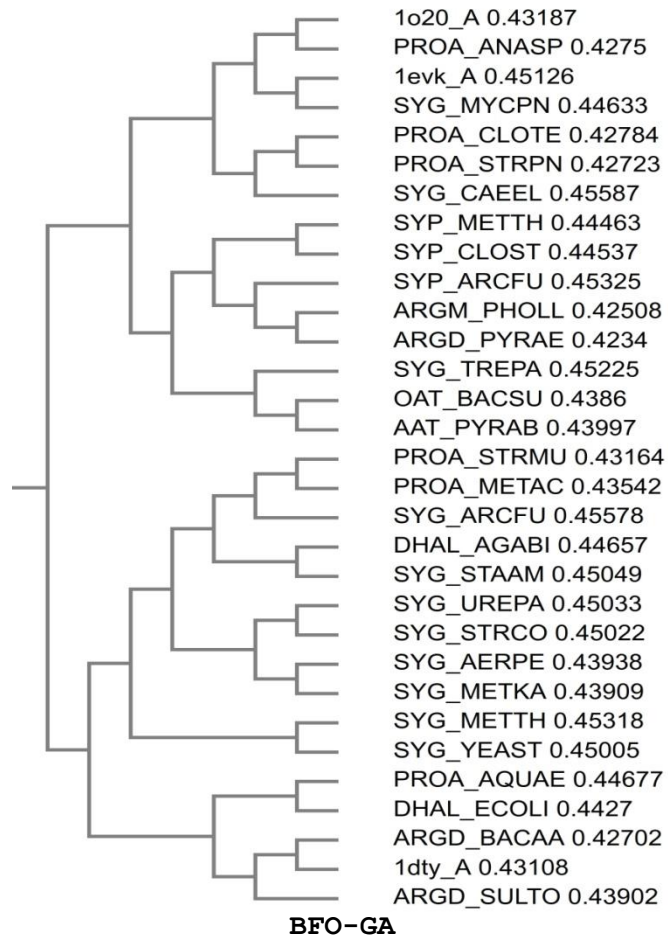

**Fig. 1: Phylogenetic Trees of RV 3 reference family in BaliBASE 3.0 Dataset**
